# Supplementary material for: Identification of SRF-E2F1 fusion transcript in EWSR-negative myoepithelioma of the soft tissue
Source: PubMed Central journal article supplement (PMC5601120; doi:10.18632/oncotarget.17958), 2017-05-17
Supplement: oncotarget-08-60036-s001.pdf [file oncotarget-08-60036-s001.pdf]

## Identification of SRF-E2F1 fusion transcript in EWSR-negative myoepithelioma of the soft tissue

### Supplementary Material

#### Supplementary File 1: Sequence of scramble SRF-E2F1 cloned into pcDNA3.1 plasmid.

Bases corresponding to SRF and E2F1 coding sequences are respectively reported in black and in green. In red is shown the insertion of an “A” that caused a premature stop codon of the fusion protein in the scramble plasmid.

ATGTTACCGACCCAAGCTGGGGCCGCGGGCGGCTCTGGGGCCGGGGCTCG-  
 GCCCTGGGGGGCAGCCTGAACCGGACCCCGACGGGGCGGCCGGGGCGGCGGCGGC-  
 GGGACACGCGGGGCTAACGGGGGCCGGGTCCCCGGGAATGGCGCGGGGCTCGGGCC-  
 GGCCGCCTGGAGCGGGAGGCTGCGGCAGCGGCGGCAACCACCCCGGCGCCCACC-  
 GCGGGGGCCCCCTACAGCGGCAGCGAGGGCGACTCGGAGTCGGGGCGAGGAGGAG-  
 GAGCTGGGCGCCGAGCGGCGCGGCCTGAAGCGGAGCCTGAGCGAGATGGAGATCG-  
 GTATGGTGGTCGGTGGGCCCGAGGCGTCCGGCAGCGGCCACCGGGGGCTACGGGCCG-  
 GTGAGCGGCGCGGTGAGCGGGGCCAAGCCGGGTAAGAAGACCCGGGGCCGCGTGAA-  
 GATCAAGATGGAGTTCATCGACAACAAGCTGCGGCGCTACACGACCTTCAGCAAGAG-  
 GAGGACGGGCATCATGAAGAAGGCCTATGAGCTGTCCACGCTGACAGGGA<sup>A</sup>CACAGGT-  
 GCTGTTGCTGGTGGCCAGTGAGACAGGCCATGTGTATACTTTGCCACCCGAAAAGT-  
 CAGCCCATGATCACCAGTGAGACCGGCAAGGCACTGATTCAGACCTGCCTCAACTCGC-  
 CAGACTCTCCACCCCGTTCAGACCCCAACAAGACCCAGAGAAATGAGTGCCACTGGCTTT-  
 GAAGAGACAGATCTCACCTACCAGGTGTCGGAGTCTGACAGCAGTGGGGAGACCAAGGA-  
 CAACTGAAGCCGGCGTTACAGTCACCAACCTGCCGGGTACAACCTCCACCATC-  
 CAAACAGCACCTAGCACCTCTACCACCATGCAAGTCAGCAGCGGCCCTCCTTTCCCAT-  
 CACCAACTACCTGGCACCAGTGTCTGCTAGTGTGTCAGCCCCAGTGTGTCAGCAGTGC-  
 CAATGGGACTGTGCTGAAGAGTACAGGCAGCGGCCCTGTCTCCTCTGGGGGCCTTATG-  
 CAGCTGCCTACCAGCTTCACCCTCATGCCTGGTGGTACGAGGGGGCAGGGAGAGATTC-  
 GTCCTTCTGGGGCAAATCAAGCATGCTAAGAGTGTGTTTAGGGCTGGCACCAAGAGA-  
 ACCTCTTTCCCTGCGATCAAAGCCCCCTCCTGAGACCCAGCTCCAAGCCGTGGACTCTTC-  
 GGAGAACTTTTCAGATCTCCCTTAAGAGCAAACAAGGCCCGATCGATGTTTTCTGT-  
 GCCCTGAGGAGACCGTAGGTGGGATCAGCCCTGGGAAGACCCCATCCCAGGAGGT-  
 CACTTCTGAGGAGGAGAACAGGGCCACTGACTCTGCCACCATAGTGTACCACCAC-  
 CATCATCTCCCCCTCATCCCTACCCACAGATCCCAGCCAGTCTCTACTCAGCCTG-  
 GAGCAAGAACCCTGTTGTCCCGGATGGGCAGCCTGCGGGCTCCCGTGGACGAG-  
 GACCGCCTGTCCCCGCTGGTGGCGGCCGACTCGCTCCTGGAGCATGTGCGGGAG-  
 GACTTCTCCGGCCTCCTCCCTGAGGAGTTCATCAGCCTTTCCCCACCCACGAGGCCCTC-  
 GACTACCACTTCGGCCTCGAGGAGGGCGAGGGCATCAGAGACCTCTTCGACTGT-  
 GACTTTGGGGACCTCACCCCTGGATTCTGA

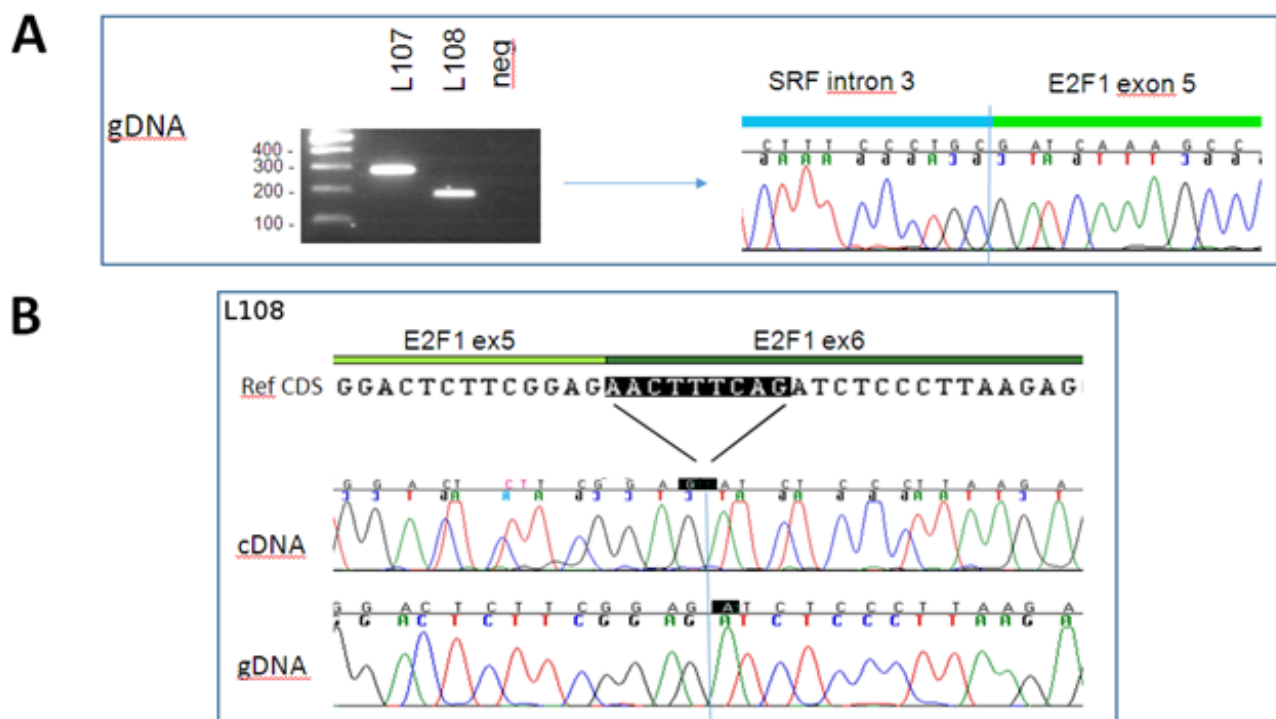

**Supplementary File 2. Identification of SRF-E2F1 genomic breakpoint.** A) PCR of SRF-E2F1 breakpoint performed on genomic DNA. Amplicons sizes were different between L107 and L108, while the sequence of the breakpoint (shown in the electropherogram on the right) was the same in both sample and corresponded to the one detected on cDNA. This discrepancy was due to a deletion occurred downstream the breakpoint region as highlighted in figure B. B) Two chromatograms showing the junction between exon 5 and exon 6 of E2F1 obtained from transcript (cDNA) and genomic DNA (gDNA) of L108. Focusing on this region it was possible to detect the deletion occurred downstream of the fusion breakpoint and that led to the loss of the entire intron 5 and of the first 9 nucleotides of exon6 of E2F1.

**Supplementary Table 3.** List of somatic mutations identified in the two SRF-E2F1 positive cases.

|             | Gene     | Exon       | cDNA                      | protein             | type of mutation        | chr position          | ratio mutated allele | dbSNP       | ExAc     |
|-------------|----------|------------|---------------------------|---------------------|-------------------------|-----------------------|----------------------|-------------|----------|
| <b>L107</b> | TYRO3    | exon17     | c.2145delG                | p.V715fs            | frameshift_deletion     | 15:41865665-41865665  | 0,25                 | Novel       | 8,60E-04 |
|             | PPP2R2B  | exon1      | c.58_59insAGCAGCAGCAGCAGC | p.C20delinsSSSSSC   | nonframeshift_insertion | 5:146258290-146258290 | 1,00                 | Novel       | n        |
|             | PROCR    | exon2      | c.G293T                   | p.R98L              | nonsynonymous_SNV       | 20:33762727-33762727  | 0,28                 | rs200377875 | 3,09E-03 |
|             | ZNF717   | exon5      | c.1727_1728insTATAAGT     | p.S576_F577delinsLX | stopgain_SNV            | 3:75787047-75787047   | 0,23                 | Novel       | n        |
|             | ZNF717   | exon5      | c.C734T                   | p.A245V             | nonsynonymous_SNV       | 3:75788040-75788040   | 0,24                 | rs111880168 | n        |
|             | FRG1     | exon5      | c.C427A                   | p.Q143K             | nonsynonymous_SNV       | 4:190876301-190876301 | 0,35                 | rs150472183 | n        |
|             | DDX47    | exon9      | c.C973T                   | p.R325X             | stopgain_SNV            | 12:12977549-12977549  | 0,45                 | Novel       | 7,41E-05 |
|             | KIR2DL3  | exon4      | c.C662T                   | p.T221I             | nonsynonymous_SNV       | 19:55255534-55255534  | 0,47                 | rs150145497 | n        |
|             | KIAA1804 | exon5      | c.C1349A                  | p.A450D             | nonsynonymous_SNV       | 1:233497836-233497836 | 0,26                 | Novel       | n        |
|             | DMGDH    | exon11     | c.G1687T                  | p.G563C             | nonsynonymous_SNV       | 5:78325854-78325854   | 0,49                 | Novel       | 1,66E-05 |
| COL4A3BP    | exon5    | c.349-2->T | nn                        | INDEL_splicing      | 5:74722305-74722305     | 0,21                  | Novel                | 7,90E-03    |          |
| <b>L108</b> | LRP2     | exon22     | c.C3253T                  | p.R1085C            | nonsynonymous_SNV       | 2:170101380-170101380 | 0,30                 | Novel       | 8,24E-06 |
|             | SLC43A1  | exon7      | c.A655G                   | p.I219V             | nonsynonymous_SNV       | 11:57263541-57263541  | 0,48                 | rs202001356 | 1,49E-04 |
|             | HYDIN    | exon48     | c.G8185A                  | p.G2729R            | nonsynonymous_SNV       | 16:70942584-70942584  | 0,26                 | rs199990018 | 3,53E-03 |
|             | CDC27    | exon14     | c.C1843A                  | p.H615N             | nonsynonymous_SNV       | 17:45214606-45214606  | 0,33                 | rs79260965  | n        |
|             | KIR2DL1  | exon3      | c.C272A                   | p.T91K              | nonsynonymous_SNV       | 19:55284986-55284986  | 0,45                 | rs117204680 | 4,24E-05 |
|             | SNX7     | exon2      | c.G350A                   | p.R117K             | nonsynonymous_SNV       | 1:99150610-99150610   | 0,38                 | rs61756174  | 3,37E-03 |
|             | TYSND1   | exon1      | c.T338C                   | p.L113P             | nonsynonymous_SNV       | 10:71906005-71906005  | 0,60                 | rs145700158 | 9,41E-03 |
|             | EMR1     | exon16     | c.C2221T                  | p.R741C             | nonsynonymous_SNV       | 19:6926611-6926611    | 0,54                 | rs149410886 | 3,30E-05 |
|             | DNAH7    | exon17     | c.C2198A                  | p.A733E             | nonsynonymous_SNV       | 2:196834679-196834679 | 0,40                 | rs78418952  | 8,45E-04 |
|             | MUC22    | exon3      | c.T4381G                  | p.S1461A            | nonsynonymous_SNV       | 6:30997589-30997589   | 0,37                 | rs11754361  | n        |
|             | POP1     | exon15     | c.C2339T                  | p.S780L             | nonsynonymous_SNV       | 8:99168559-99168559   | 0,46                 | rs149744031 | 7,41E-05 |
|             | SKA3     | exon9      | c.1120-2->T               | nn                  | INDEL_splicing          | 13:21729952-21729952  | 0,88                 | rs11446085  | n        |
